# Supplementary material for: β-Cyclodextrin-Polyacrylamide Hydrogel for Removal of Organic Micropollutants from Water
Source: MDPI journal article supplement (doi:10.3390/molecules26165031), 2021-08-19
Supplement: s1 [file s1]

# **$\beta$ -Cyclodextrin-Polyacrylamide Hydrogel for Removal of Organic Micropollutants from Water**

**Xia Song <sup>1,†</sup>, Nana Nyarko Mensah <sup>1,2,†</sup>, Yuting Wen <sup>1</sup>, Jingling Zhu <sup>1</sup>, Zhongxing Zhang <sup>1</sup>, Wui Siew Tan <sup>2</sup>, Xinwei Chen <sup>2</sup> and Jun Li <sup>1,\*</sup>**

<sup>1</sup> Department of Biomedical Engineering, Faculty of Engineering, National University of Singapore, 7 Engineering Drive 1, Singapore 117574, Singapore; a0045788@u.nus.edu (X.S.); nn.mensah@u.nus.edu (N.N.M.); bieweny@nus.edu.sg (Y.W.); erizhuj@nus.edu.sg (J.Z.); biezhozh@nus.edu.sg (Z.Z.)

<sup>2</sup> Institute of Materials Research and Engineering, A\*STAR (Agency for Science, Technology and Research), 2 Fusionopolis Way, Singapore 138634, Singapore; wuisiew@gmail.com (W.S.T.); CHEN\_Xinwei@nrf.gov.sg (X.C.)

\* Correspondence: jun-li@nus.edu.sg or jun-li@u.nus.edu; Tel. +65-65-167-273

† These authors contribute equally.

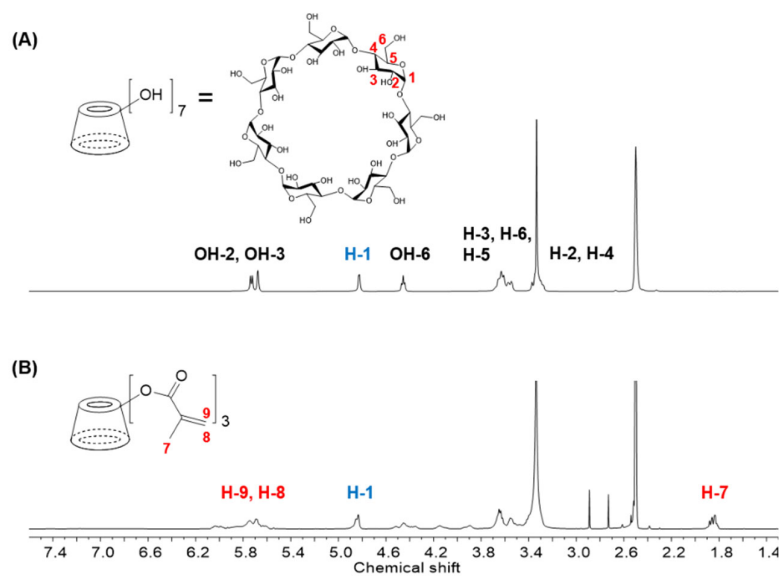

**Figure S1.** The 600 MHz  $^1\text{H}$  NMR spectra of (A) pure  $\beta$ -CD and (B)  $\beta$ -CD-MA measured in DMSO- $d_6$  at room temperature.

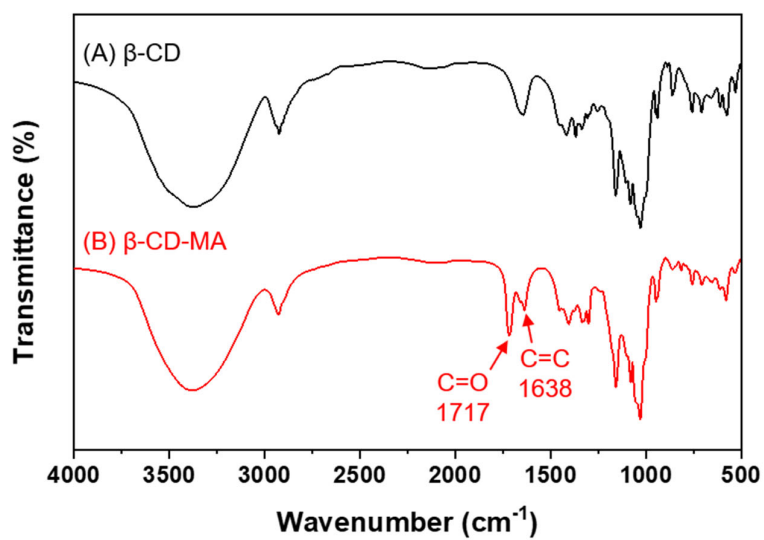

**Figure S2.** FTIR spectra of (A)  $\beta$ -CD and (B)  $\beta$ -CD-MA.

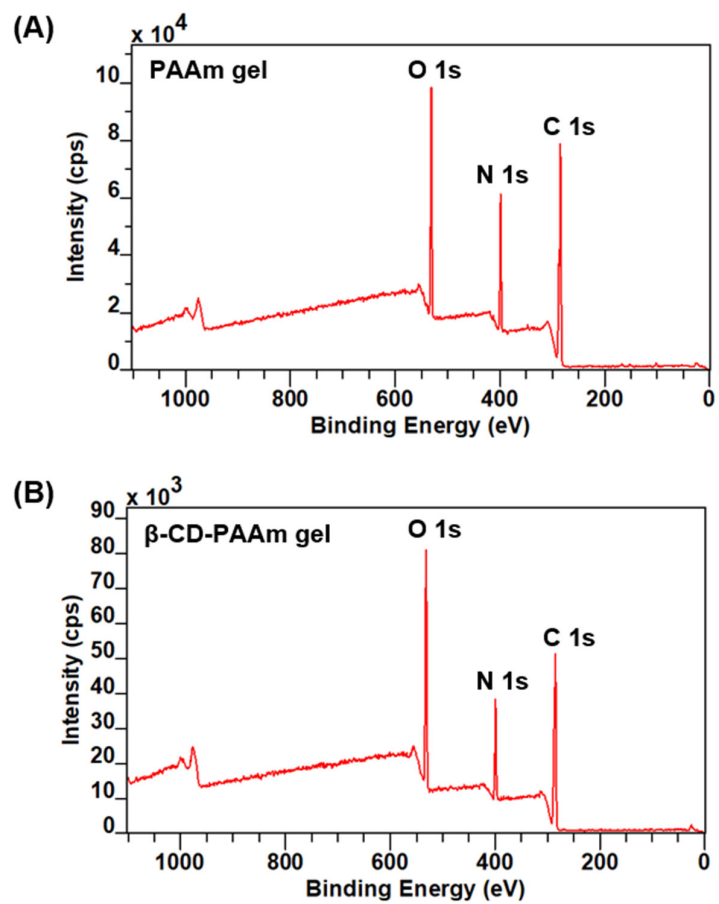

Figure S3. XPS survey spectra of (A) PAAm gel and (B)  $\beta$ -CD-PAAm gel.
